# Supplementary material for: Direct reduction of NO into N2 catalyzed by fullerene-supported rhodium clusters
Source: Royal Society of Chemistry journal article supplement (doi:10.1039/d4cp01398k), 2024-01-01
Supplement: d4cp01398k1.pdf [file d4cp01398k1.pdf]

## Electronic Supplementary Information

### Direct reduction of NO into N<sub>2</sub> catalyzed by fullerene-supported rhodium clusters

Ruomeng Li, Ya-Ke Li\*, Jianzhi Xu, Gao-Lei Hou\*

MOE Key Laboratory for Non-Equilibrium Synthesis and Modulation of Condensed Matter, School of Physics, Xi'an Jiaotong University, Xi'an, 710049 Shaanxi, China

E-mail: yake.li@xjtu.edu.cn; gaolei.hou@xjtu.edu.cn

#### Table of Content

|                                                                                                                                                    |     |
|----------------------------------------------------------------------------------------------------------------------------------------------------|-----|
| Figure S1. Calculated isomers of C <sub>60</sub> Rh <sub>4</sub> <sup>+</sup> .....                                                                | S2  |
| Figure S2. Calculated isomers of Rh <sub>4</sub> <sup>+</sup> .....                                                                                | S2  |
| Figure S3. Calculated isomers of C <sub>60</sub> Rh <sup>+</sup> .....                                                                             | S2  |
| Figure S4. Comparison between theoretical and experimental infrared spectra of C <sub>60</sub> Rh <sub>4</sub> <sup>+</sup> and IRMPD spectra..... | S3  |
| Figure S5. Reaction pathway of NO on C <sub>60</sub> Rh <sup>+</sup> .....                                                                         | S4  |
| Figure S6. Reaction pathway of NO on square Rh <sub>4</sub> <sup>+</sup> .....                                                                     | S5  |
| Figure S7. Calculated NBO partial charges ( <i>e</i> ) for the reaction of pyramid Rh <sub>4</sub> <sup>+</sup> and NO.....                        | S6  |
| Figure S8. Calculated NBO partial charges ( <i>e</i> ) for the reaction of square Rh <sub>4</sub> <sup>+</sup> and NO.....                         | S7  |
| Figure S9. Calculated NBO partial charges ( <i>e</i> ) for the reaction of C <sub>60</sub> Rh <sup>+</sup> and NO.....                             | S8  |
| Cartesian coordinates of C <sub>60</sub> Rh <sub>4</sub> <sup>+</sup> , C <sub>60</sub> Rh <sup>+</sup> , and Rh <sub>4</sub> <sup>+</sup> .....   | S9  |
| References.....                                                                                                                                    | S11 |

### Confirmation of the ground state structures of $\text{Rh}_4^+$ , $\text{C}_{60}\text{Rh}_4^+$ , and $\text{C}_{60}\text{Rh}^+$

Figures S1, S2, and S3 respectively show the energy differences between the isomers of  $\text{Rh}_4^+$ ,  $\text{C}_{60}\text{Rh}_4^+$ , and  $\text{C}_{60}\text{Rh}^+$ . Calculations show that for  $\text{Rh}_4^+$  the pyramidal structure is more stable than the square structure, with the doublet states being slightly more stable than the quartet states. For  $\text{C}_{60}\text{Rh}_4^+$ , the structure with a square  $\text{Rh}_4^+$  moiety possessing a quartet state is most stable and its simulated infrared spectrum gives the largest cosine similarity score (see Figure S4). For  $\text{C}_{60}\text{Rh}^+$ , the  $\eta^{6-6}$  structure with a triplet state is the most stable one, consistent with previous results.<sup>1</sup>

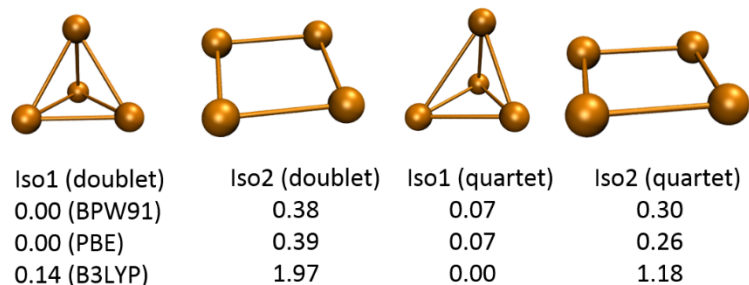

**Figure S1.** Energy differences (in eV) between different isomers of  $\text{Rh}_4^+$  at the BPW91, PBE, and B3LYP levels.

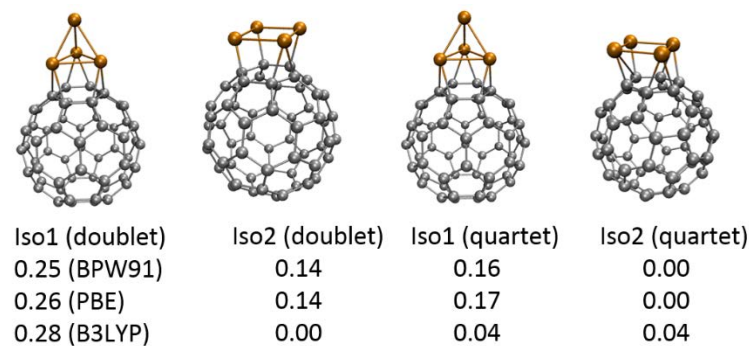

**Figure S2.** Energy differences (in eV) between different isomers of  $\text{C}_{60}\text{Rh}_4^+$  at the BPW91, PBE, and B3LYP levels.

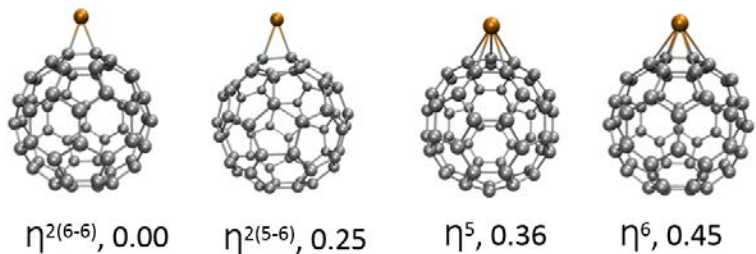

**Figure S3.** Energy differences (in eV) between different isomers of  $\text{C}_{60}\text{Rh}^+$  at the BPW91 level.

### Cosine Similarity Score

Cosine similarity score was employed to quantitatively evaluate the agreement between calculated and experimental infrared spectra.<sup>2-5</sup> Figure S4 displays the calculated cosine similarity scores of the theoretical spectra and experimental one for  $C_{60}Rh_4^+$ . It can be seen that the cosine similarity score for the Iso2 quartet is largest, suggesting Iso2  $C_{60}Rh_4^+$  with a quartet state the most probable structure exist in the experiment.

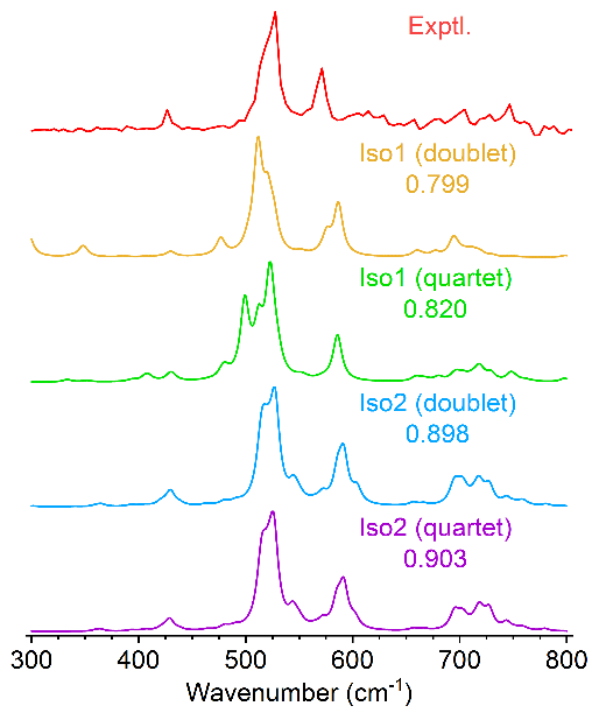

**Figure S4.** The theoretical infrared spectra for the four isomers of  $C_{60}Rh_4^+$  and their comparison with experimental spectrum. Cosine similarity scores are provided.

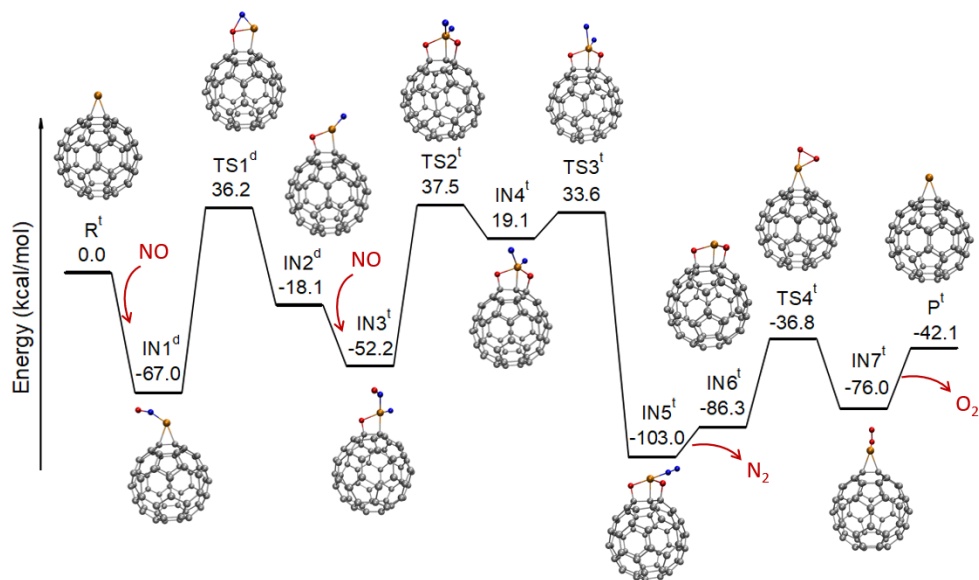

**Figure S5.** Reaction pathway of NO reduction on C<sub>60</sub>Rh<sup>+</sup> calculated at the BPW91/6-31G(d)&SDD level of theory. R represents for reactants, IN for intermediates, TS for transition states, and P for products. All energies are provided relative to the energies of the reactants, i.e., C<sub>60</sub>Rh<sup>+</sup> and two NO molecules. Calculations show that N–O dissociations post high energy barriers of 103.2 (TS1) and 89.7 (TS2) kcal/mol, respectively.

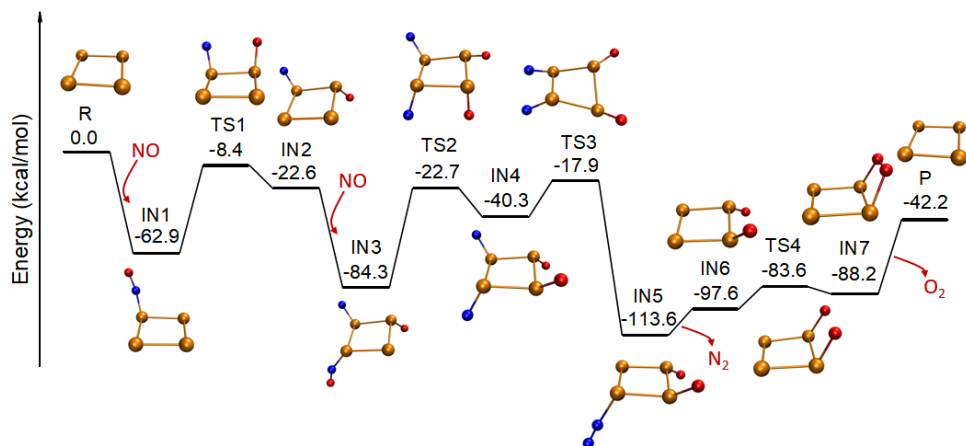

**Figure S6.** Reaction pathway of NO reduction on square Rh<sub>4</sub><sup>+</sup> calculated at the BPW91/6-31G(d)&SDD level of theory. R represents for reactants, IN for intermediates, TS for transition states, and P for products. All energies are provided relative to the energies of the reactants, i.e., Rh<sub>4</sub><sup>+</sup> and two NO molecules.

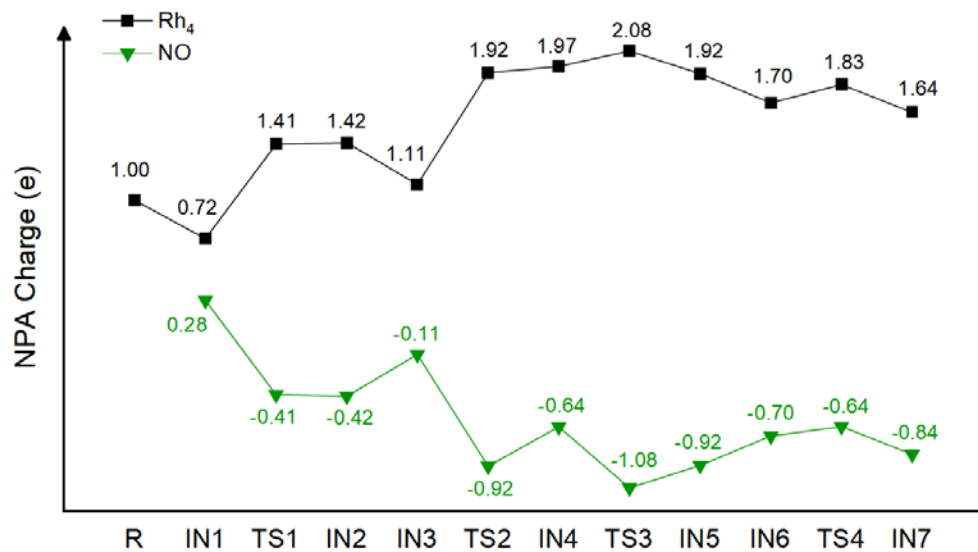

**Figure S7.** Calculated NBO partial charges (e) of pyramid Rh<sub>4</sub><sup>+</sup> cluster (black square) of NO reduction catalyzed by Rh<sub>4</sub><sup>+</sup>

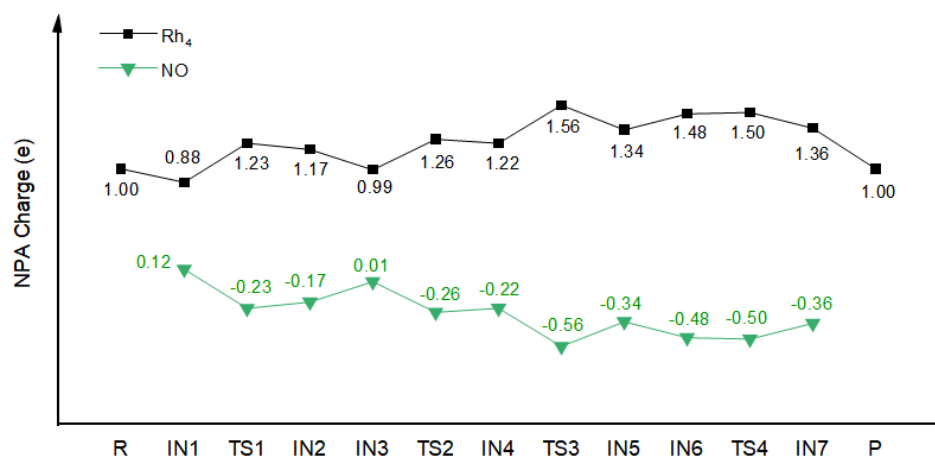

**Figure S8.** Calculated NBO partial charges (e) of square  $Rh_4^+$  cluster (black square) of NO reduction catalyzed by  $Rh_4^+$

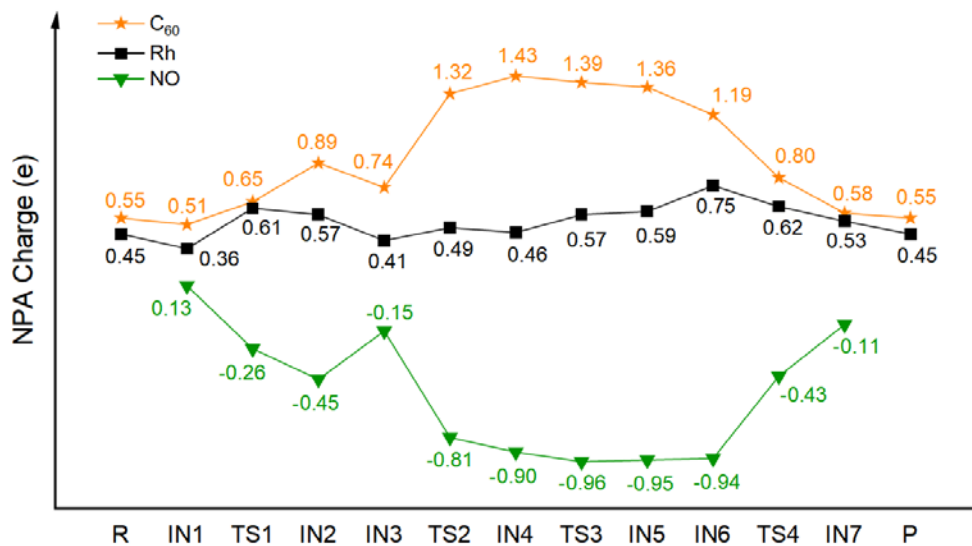

**Figure S9.** Calculated NBO partial charges (e) of Rh<sup>+</sup> (black square) and C<sub>60</sub> (orange star) of NO reduction catalyzed by C<sub>60</sub>Rh<sup>+</sup>



**Cartesian coordinates of the most stable C<sub>60</sub>Rh<sub>4</sub><sup>+</sup>, C<sub>60</sub>Rh<sup>+</sup>, and Rh<sub>4</sub><sup>+</sup> at the BPW91/6-31G(d)&SDD level of theory**

| C <sub>60</sub> Rh <sub>4</sub> <sup>+</sup> |           |           |            | C <sub>60</sub> Rh <sup>+</sup> |            |            |            |
|----------------------------------------------|-----------|-----------|------------|---------------------------------|------------|------------|------------|
| C                                            | 8.5931280 | 6.7238380 | 7.5364780  | C                               | 2.1089020  | -2.2498480 | -1.7938820 |
| C                                            | 9.4582700 | 6.3148530 | 6.4189110  | C                               | 1.2936900  | -1.7040880 | -2.8645880 |
| C                                            | 7.6709300 | 5.7625170 | 8.1271720  | C                               | 1.5306790  | -3.1045930 | -0.8334570 |
| C                                            | 9.4215980 | 4.9973880 | 5.9426630  | C                               | -0.0736710 | -2.0290860 | -2.9412830 |
| C                                            | 9.5093960 | 4.7352090 | 4.5172900  | C                               | -1.0468060 | -1.0016560 | -3.2677620 |
| C                                            | 9.5499350 | 7.4220430 | 5.4823380  | C                               | 1.7343240  | -0.3355590 | -3.1147160 |
| C                                            | 9.6425580 | 7.1739790 | 4.1007210  | C                               | 0.7935160  | 0.6573180  | -3.4285360 |
| C                                            | 9.6196220 | 5.8052170 | 3.6088130  | C                               | -0.6222170 | 0.3191680  | -3.5029720 |
| C                                            | 5.7909210 | 7.5697550 | 8.2658840  | C                               | 2.8005500  | -1.9815320 | 0.9633160  |
| C                                            | 6.7707700 | 8.5068530 | 7.5719080  | C                               | 3.3902040  | -1.0904080 | -0.0216480 |
| C                                            | 6.2584510 | 6.1412450 | 8.5552880  | C                               | 1.8781760  | -2.9609770 | 0.5663220  |
| C                                            | 8.1379890 | 8.1144760 | 7.2558410  | C                               | 3.0568370  | -1.2249490 | -1.3801770 |
| C                                            | 8.7359940 | 8.5205190 | 5.9741390  | C                               | 2.8252750  | -0.0395980 | -2.1958290 |
| C                                            | 6.0179650 | 9.2887850 | 6.5752740  | C                               | 3.5031190  | 0.2363400  | 0.5714810  |
| C                                            | 6.6254480 | 9.6984810 | 5.3796710  | C                               | 3.2784060  | 1.3783010  | -0.2151970 |
| C                                            | 8.0074400 | 9.3094750 | 5.0732810  | C                               | 2.9346670  | 1.2382860  | -1.6242060 |
| C                                            | 4.1458960 | 5.2608700 | 7.4880580  | C                               | 0.4109740  | -2.4768940 | 2.5271650  |
| C                                            | 3.6945830 | 6.6399060 | 7.2092580  | C                               | 1.3854870  | -1.4768630 | 3.0151700  |
| C                                            | 5.3987670 | 5.0272240 | 8.0625690  | C                               | 0.6658770  | -3.2127410 | 1.3660390  |
| C                                            | 4.5127330 | 7.7309570 | 7.5163260  | C                               | 2.6021020  | -1.2240370 | 2.2186540  |
| C                                            | 4.6460890 | 8.8174830 | 6.5635910  | C                               | 2.9850160  | 0.1752160  | 1.9279470  |
| C                                            | 2.9462430 | 6.6170390 | 5.9681970  | C                               | 0.5955320  | -0.3205580 | 3.4933450  |
| C                                            | 3.0396650 | 7.6903380 | 5.0592540  | C                               | 1.0251710  | 0.9914180  | 3.2421870  |
| C                                            | 3.9066050 | 8.8129520 | 5.3638820  | C                               | 2.2369800  | 1.2424090  | 2.4473640  |
| C                                            | 5.7733260 | 3.1234480 | 6.5109520  | C                               | -1.7180280 | -3.0432630 | 0.7126580  |
| C                                            | 4.4620310 | 3.3530230 | 5.9335860  | C                               | -1.9792860 | -2.2689850 | 1.9175710  |
| C                                            | 6.2384240 | 3.9631920 | 7.5434330  | C                               | -0.4151820 | -3.5080950 | 0.4412940  |
| C                                            | 3.6684530 | 4.4150260 | 6.4118360  | C                               | -0.9277800 | -1.9852910 | 2.8049620  |
| C                                            | 2.9255780 | 5.2465090 | 5.4736790  | C                               | -0.8141890 | -0.6587800 | 3.3987490  |
| C                                            | 4.5480680 | 3.0961350 | 4.5044910  | C                               | -2.9563950 | -1.2384430 | 1.5907750  |
| C                                            | 3.8332220 | 3.9015700 | 3.6014490  | C                               | -2.8470230 | 0.0394270  | 2.1624040  |
| C                                            | 3.0034160 | 4.9943910 | 4.0963770  | C                               | -1.7558090 | 0.3344050  | 3.0823560  |
| C                                            | 8.4864770 | 4.0261300 | 6.5232510  | C                               | -0.6721620 | -2.9159070 | -1.9496360 |
| C                                            | 8.0109330 | 3.1702840 | 5.4512760  | C                               | -2.0185940 | -2.4317050 | -1.6670950 |
| C                                            | 7.6209670 | 4.4024890 | 7.5606810  | C                               | 0.1143590  | -3.4420150 | -0.9156060 |
| C                                            | 6.6760010 | 2.7249400 | 5.4439950  | C                               | -2.5321840 | -2.4970520 | -0.3584160 |
| C                                            | 5.9206730 | 2.7046210 | 4.2004330  | C                               | -3.2990930 | -1.3792340 | 0.1823070  |
| C                                            | 8.6395440 | 3.6071970 | 4.2105250  | C                               | -2.2492840 | -1.2506720 | -2.4792130 |
| C                                            | 7.9098930 | 3.5903750 | 3.0128560  | C                               | -2.9837820 | -0.1705900 | -1.9560370 |
| C                                            | 6.5250560 | 3.1325130 | 3.0070840  | C                               | -3.5218610 | -0.2373010 | -0.6026550 |
| C                                            | 4.0139730 | 5.7026320 | 2.0915070  | C                               | -2.1267230 | 2.2499100  | 1.7662820  |
| C                                            | 4.4592200 | 4.3422500 | 2.3648160  | C                               | -3.0775030 | 1.2247200  | 1.3476100  |
| C                                            | 5.7832380 | 3.9646580 | 2.0719980  | C                               | -3.4092500 | 1.0887880  | -0.0098450 |
| C                                            | 4.9071860 | 6.6367740 | 1.5347490  | C                               | -1.5450930 | 3.1036880  | 0.8102490  |
| C                                            | 4.0527750 | 8.3973480 | 3.0533370  | C                               | 0.6581630  | 2.9072740  | 1.9255780  |
| C                                            | 3.1271430 | 7.4284570 | 3.6314430  | C                               | 0.0579010  | 2.0205330  | 2.9153830  |
| C                                            | 3.1114160 | 6.1055890 | 3.1577710  | C                               | -1.3123050 | 1.6988090  | 2.8348790  |
| C                                            | 4.9263140 | 8.0062730 | 2.0253270  | C                               | -0.1278080 | 3.4392770  | 0.8941820  |
| C                                            | 6.7767260 | 9.2855940 | 3.0655990  | C                               | 1.6999560  | 3.0433300  | -0.7400670 |
| C                                            | 5.8733570 | 9.6850240 | 4.1380050  | C                               | 2.5138970  | 2.4918670  | 0.3284670  |
| C                                            | 4.5345850 | 9.2510000 | 4.1286330  | C                               | 2.0035030  | 2.4233300  | 1.6406410  |
| C                                            | 6.3123030 | 8.4607000 | 2.0303800  | C                               | 0.4000330  | 3.5070000  | -0.4639500 |
| C                                            | 8.4171530 | 7.1494480 | 2.0918030  | C                               | -0.4387310 | 2.4609330  | -2.5439500 |
| C                                            | 8.8985090 | 8.0038510 | 3.1659640  | C                               | 0.9072190  | 1.9833030  | -2.8354140 |
| C                                            | 8.0932470 | 9.0539310 | 3.6464920  | C                               | 1.9579580  | 2.2686390  | -1.9496900 |
| C                                            | 7.1462980 | 7.3712500 | 1.5357840  | C                               | -0.6864930 | 3.2133110  | -1.3812530 |
| C                                            | 6.7064930 | 4.9323730 | 1.4959050  | C                               | -2.8013840 | 1.9715480  | -0.9982620 |
| C                                            | 8.0217830 | 4.7009170 | 2.0744670  | C                               | -2.5431610 | 1.1944870  | -2.2015440 |
| C                                            | 8.8631890 | 5.7870760 | 2.3669930  | C                               | -1.3829340 | 1.4351390  | -2.9610060 |
| C                                            | 6.2764040 | 6.2448440 | 1.2302910  | C                               | -1.8895240 | 2.9635890  | -0.5933490 |
| Rh                                           | 5.8390550 | 8.4378690 | 10.1048570 | Rh                              | 3.0854410  | -2.0816780 | 4.0530090  |
| Rh                                           | 8.8743760 | 6.6334690 | 9.6459080  |                                 |            |            |            |
| Rh                                           | 8.0705250 | 9.0842430 | 9.1508800  |                                 |            |            |            |
| Rh                                           | 6.5818390 | 6.1751120 | 10.5638460 |                                 |            |            |            |

|          |           |           |           |  |
|----------|-----------|-----------|-----------|--|
| $Rh_4^+$ |           |           |           |  |
| Rh       | 0.2128110 | 1.2404850 | 5.4326590 |  |
| Rh       | 2.4844410 | 0.5876130 | 4.9540880 |  |
| Rh       | 1.7865360 | 2.9451640 | 4.4989710 |  |
| Rh       | 2.0651730 | 2.2369160 | 6.7864860 |  |

## References

- (1) German, E.; Hou, G.-L.; Vanbuel, J.; Bakker, J. M.; Alonso, J. A.; Janssens, E.; López, M. J. Infrared spectra and structures of  $C_{60}Rh_n^+$  complexes. *Carbon* **2022**, *197*, 535-543.
- (2) Fu, W.; Hopkins, W. S. Applying machine learning to vibrational spectroscopy. *J. Phys. Chem. A* **2018**, *122*, 167-171.
- (3) Kempkes, L. J.; Martens, J.; Berden, G.; Houthuijs, K. J.; Oomens, J. Investigation of the position of the radical in  $z_3$ -ions resulting from electron transfer dissociation using infrared ion spectroscopy. *Faraday Discuss.* **2019**, *217*, 434-452.
- (4) Müller, F.; Stückrath, J. B.; Bischoff, F. A.; Gagliardi, L.; Sauer, J.; Debnath, S.; Jorewitz, M.; Asmis, K. R. Valence and Structure Isomerism of  $Al_2FeO_4^+$ : Synergy of Spectroscopy and Quantum Chemistry. *J. Am. Chem. Soc.* **2020**, *142*, 18050-18059.
- (5) Xu, J.; Bakker, J. M.; Lushchikova, O. V.; Lievens, P.; Janssens, E.; Hou, G.-L. Pentagon, Hexagon, or Bridge? Identifying the Location of a Single Vanadium Cation on Buckminsterfullerene Surface. *J. Am. Chem. Soc.* **2023**, *145*, 22243-22251.
